# Supplementary material
Source: PubMed Central journal article supplement (PMC5837788)
Supplement: ehw547_supp.pdf [file ehw547_supp.pdf]

**Supplementary Table 1: Randomised controlled gene therapy trials for CAD and PAD**

| Coronary artery disease     |                   |        |                                  |
|-----------------------------|-------------------|--------|----------------------------------|
| Trial name or ID            | GP                | Pat no | Main endpoint result             |
| VIF-CAD                     | VEGF-A/FGF-2      | 52     | - myocardial perfusion           |
| NOVA                        | VEGF-A121         | 17     | - exercise tolerance             |
| Ad2HIF                      | Hif-1a            | 13     | + safety                         |
| Northern                    | AdVEGF-A121       | 93     | - myocardial perfusion           |
| AGENT-4                     | VEGF + L-arginine | 19     | + myocardial perfusion           |
| AGENT-3                     | FGF-4             | 116    | - exercise tolerance             |
| Genasis                     | FGF-4             | 416    | - exercise tolerance             |
| REVASC                      | VEGF-C            | 295    | - exercise tolerance             |
| NCT00135850                 | VEGF-A121         | 67     | + exercise tolerance, symptoms   |
| Euroinject One              | VEGF-A+GCSF       | 48     | - myocardial perfusion           |
| AGENT-2                     | VEGF-A165         | 80     | - myocardial perfusion           |
| KAT                         | FGF-4             | 52     | +/- myocardial perfusion (trend) |
| AGENT                       | VEGF-A165         | 103    | - restenosis                     |
| VEGF-2                      | FGF-4             | 79     | + safety                         |
|                             | VEGF-C            | 19     | + safety                         |
| Peripheral arterial disease |                   |        |                                  |
| Trial name or ID            | GP                | Pat no | Main endpoint result             |
| TAMARIS                     | FGF-1             | 525    | - amputation/ death              |
| WALK                        | Hif-1a/VP16       | 289    | - exercise tolerance             |
| Anghel                      | VEGF/HGF          | 43     | + major amputations              |
| Collatogene                 | HGF               | 44     | + ulcer healing/ symptoms        |
| HGF-0205                    | HGF               | 27     | + safety                         |
| TALISMAN                    | FGF-1             | 125    | - ulcer healing                  |
| HGF-STAT                    | HGF               | 104    | +safety                          |
| DELTA-1                     | Del-1             | 105    | - exercise tolerance             |
| Groeningen trial            | Hif-1a/VP16       | 34     | + safety                         |
| RAVE                        | VEGF-A165         | 54     | - amputations                    |
|                             | FGF-4             | 13     | + safety                         |
|                             | VEGF-A121         | 105    | - exercise tolerance             |
|                             | VEGF-A165         | 54     | + vascularity                    |

  

| Trial name or ID            | Vector  | Delivery    | Pat no | Main endpoint result             | Secondary endpoint result         | Ref                                                |                      |                           |                             |
|-----------------------------|---------|-------------|--------|----------------------------------|-----------------------------------|----------------------------------------------------|----------------------|---------------------------|-----------------------------|
| VIF-CAD                     | PI      | i.m. (cat)  | 52     | - myocardial perfusion           | + exercise tolerance, symptoms    | Kukula, Am HJ, 2011                                |                      |                           |                             |
| NOVA                        | Ad      | i.my. (cat) | 17     | - exercise tolerance             | - myocardial perfusion            | Kastrup, Eurointerv, 2011                          |                      |                           |                             |
| Ad2HIF                      | Ad      | i.m. (tct)  | 13     | + safety                         |                                   | Kilian, Circ J, 2010                               |                      |                           |                             |
| Northern                    | Ad      | i.my. (cat) | 93     | - myocardial perfusion           | - exercise tolerance              | Stewart, Mol Ther, 2009                            |                      |                           |                             |
| AGENT-4                     | PI      | i.m. (tct)  | 19     | + myocardial perfusion           | + left ventricular function       | Ruel, J Thor Cardiovasc Surg, 2008                 |                      |                           |                             |
| AGENT-3                     | Ad      | i.c. (cat)  | 116    | - exercise tolerance             | + exercise tolerance (women)      | Henry, JACC, 2007                                  |                      |                           |                             |
| Genasis                     | Ad      | i.c. (cat)  | 416    | - exercise tolerance             | + exercise tolerance (women)      | Henry, JACC, 2007                                  |                      |                           |                             |
| REVASC                      | PI      | i.m. (cat)  | 295    | - exercise tolerance             |                                   | http://www.medicalnewstoday.com/releases/53786.php |                      |                           |                             |
| NCT00135850                 | Ad      | i.m. (tct)  | 67     | + exercise tolerance, symptoms   | - myocardial perfusion            | Stewart, Gene Ther, 2006                           |                      |                           |                             |
| Euroinject One              | PI      | i.m. (cat)  | 48     | - myocardial perfusion           | - symptoms                        | Ripa, Eur HJ, 2006                                 |                      |                           |                             |
| AGENT-2                     | PI      | i.my. (cat) | 80     | - myocardial perfusion           | + left ventricular function       | Kastrup, JACC, 2005                                |                      |                           |                             |
| KAT                         | Ad      | i.c. (cat)  | 52     | +/- myocardial perfusion (trend) |                                   | Grines, JACC, 2003                                 |                      |                           |                             |
| AGENT                       | Ad / PI | i.c. (cat)  | 103    | - restenosis                     | + myocardial perfusion            | Hedman, Circ, 2003                                 |                      |                           |                             |
| VEGF-2                      | Ad      | i.c. (cat)  | 79     | + safety                         | +/- exercise tolerance (subgroup) | Grines, Circ, 2002                                 |                      |                           |                             |
|                             | PI      | i.my. (cat) | 19     | + safety                         | + symptoms                        | Losordo, Circ, 2002                                |                      |                           |                             |
| Peripheral arterial disease |         |             |        | Vector                           | Delivery                          | Pat no                                             | Main endpoint result | Secondary endpoint result | Ref                         |
| TAMARIS                     | PI      | i.m.        | 525    | - amputation/ death              |                                   |                                                    |                      | - ABI, symptoms           | Belch, Lancet, 2011         |
| WALK                        | Ad      | i.m.        | 289    | - exercise tolerance             |                                   |                                                    |                      | + symptoms                | Creager, Circ, 2011         |
| Anghel                      | PI      | i.m.        | 43     | + major amputations              |                                   |                                                    |                      | + quality of life         | Anghe, Cur Neur Res, 2011   |
| Collatogene                 | PI      | i.m.        | 44     | + ulcer healing/ symptoms        |                                   |                                                    |                      | + TBI, symptoms           | Shigematsu, Gene Ther, 2010 |
| HGF-0205                    | PI      | i.m.        | 27     | + safety                         |                                   |                                                    |                      | -/+ major amputations     | Powell, J Vasc Surg, 2010   |
| TALISMAN                    | PI      | i.m.        | 125    | - ulcer healing                  |                                   |                                                    |                      | +TcPO2                    | Nikol, Mol Ther, 2008       |
| HGF-STAT                    | PI      | i.m.        | 104    | +safety                          |                                   |                                                    |                      | - ABI                     | Powell, Circ, 2008          |
| DELTA-1                     | PI      | i.m.        | 105    | - exercise tolerance             |                                   |                                                    |                      |                           | Grossmann, Am HJ, 2007      |
| Groeningen trial            | Ad      | i.m.        | 34     | + safety                         |                                   |                                                    |                      | + ulcer healing           | Rajagopalan, Circ, 2007     |
| RAVE                        | PI      | i.m.        | 54     | - amputations                    |                                   |                                                    |                      | + vascularity             | Kusumanto, HGT, 2006        |
|                             | Ad      | i.m.        | 13     | + safety                         |                                   |                                                    |                      | - ABI, symptoms           | Matyas, HGT, 2005           |
|                             | Ad      | i.m.        | 105    | - exercise tolerance             |                                   |                                                    |                      | - ABI, symptoms           | Rajagopalan, Circ, 2003     |
|                             | Ad/PI   | i.a.        | 54     | + vascularity                    |                                   |                                                    |                      |                           | Mäkinen, Mol Ther, 2002     |

GP = gene product

tct = thoracotomy

cat = catheter-mediated

- = no effect, + = positive effect

ABI = ankle-brachial index, TBI = toe-brachial index, TcPO2 = Transcutaneous oxygen pressure

Ad = adenovirus

RV = retrovirus

PI = plasmid

i.my. = intramyocardial

i.a. = intra-arterial

i.c. = intracoronary

i.m. = intramuscular
